# Supplementary material for: Evaluating the risk of patient re-identification from adverse drug event reports
Source: PubMed Central journal article supplement (PMC4137558; doi:10.1186/1472-6947-13-114), 2013-10-05
Supplement: 1472-6947-13-114-S1.pdf [file 1472-6947-13-114-S1.pdf]

# Appendix A: Proofs

This appendix contains the proofs for the lemmas and theorems in the main text of the article.

## A.1 Proof of Lemma 1

Denote by:

1.  $A_h$ , the fact that the  $h^{\text{th}}$  record is the match, and by  $\neg A_h$  the fact that the  $h^{\text{th}}$  record is not a correct match
2.  $B_h$ , the fact that the  $h^{\text{th}}$  record can be verified (as a match or non-match), and by  $\neg B_h$  the fact that the  $h^{\text{th}}$  record can not be verified.

Note that, the adversary reaches the  $n^{\text{th}}$  attempt only when every previous attempt was either unverifiable or verified as a non-match.

Consider first the case where  $F_j > n + 1$ , the probability of getting a successful match from the  $n^{\text{th}}$  attempt,  $P_j^n$ , is the probability that the  $n^{\text{th}}$  record is the match and that the match can be verified and that the previous records attempted were either verified as non-match or unverifiable

$$P_j^n = \Pr\{A_n \wedge B_n \wedge \left(\bigcap_{h=1}^{n-1} [(\neg A_h \wedge B_h) \vee (\neg B_h)]\right)\}$$

However, because there is only one correct match, we get:

$$\begin{aligned} P_j^n &= \Pr\{A_n \wedge B_n \wedge \left(\bigcap_{h=1}^{n-1} [(\neg A_h \wedge B_h) \vee (\neg A_h \neg B_h)]\right)\} \\ &= \Pr\{A_n \wedge B_n \wedge \left(\bigcap_{h=1}^{n-1} [B_h \vee \neg B_h]\right)\} \\ &= \Pr\{A_n \wedge B_n\} \\ &= \frac{P}{F_j} \end{aligned}$$

When  $F_j - 1 = n$ , then we need to consider two cases:

1. The case where the  $n^{\text{th}}$  attempt is the match, and
2. the case where all the  $F_j - 1$  attempts result in verified non-matches, as this implies that the last record will be the match (without having to go any further than  $n$  attempts).

$$\begin{aligned}
 P_j^n &= \Pr\{A_n \wedge B_n \wedge (\bigcap_{h=1}^{n-1} [(\neg A_h \wedge B_h) \vee (\neg B_h)])\} + \Pr\{\bigcap_{h=1}^n (\neg A_h \wedge B_h)\} \\
 &= \Pr\{A_n \wedge B_n\} + \Pr\{A_{n+1} \wedge \bigcap_{h=1}^n B_h\} \\
 &= \frac{p}{F_j} + \frac{p^{F_j-1}}{F_j}
 \end{aligned}$$

When  $F_j = n$ , then we need to consider two cases

1. the case where, out of the  $F_j$  attempts performed,  $F_j - 1$  of these result in verified non-matches and only one attempt was unverifiable, in such case, we can deduce the sole unverified record is the correct match.
2. The case where the  $n^{\text{th}}$  attempt is the match that was not discovered in the previous attempt (i.e. we need to discard the case where the  $F_j - 1$  previous attempts resulted in verified non-matches)

$$P_j^n = \Pr[A_n \wedge B_n \wedge \exists i \in \{1, \dots, n\} \text{ s.t. } \neg B_i] + \Pr[(\neg A_n \wedge B_n) \wedge (\bigcup_{i=1}^{n-1} (A_i \wedge \neg B_i \wedge B_h \text{ for some } h \neq i))]$$

Where  $\exists i \in \{1, \dots, n\} \text{ s.t. } \neg B_i$  means that at least one of the previous matches was unverifiable.

$$P_j^n = (1 - p^{F_j-1}) \frac{p}{F_j} + \frac{(F_j - 1)p(1 - p)p^{F_j-2}}{F_j}$$

## A.2 Proof of Lemma 2

We consider each of the different cases separately:

1. if  $F_j > M_j + 1$ , then

$$R_2^j = P_j^1 + P_j^2 + \dots + P_j^{M_j} \quad \text{From Lemma 1 we get:}$$

$$R_2^j = M_j \frac{p}{F_j}$$

2. if  $F_j = M_j + 1$ , then:

$$R_2^j = P_j^1 + P_j^2 + \dots + P_j^{M_j-1} + P_j^{M_j}$$

Hence, from Lemma 1, we get:

$$R_2^j = M_j \frac{p}{F_j} + \frac{p^{F_j-2}}{F_j}$$

3. if  $F_j = M_j$  then:

$$R_2^j = P_j^1 + P_j^2 + \dots + P_j^{M_j-2} + P_j^{M_j-1} + P_j^{M_j} \text{ then from Lemma 1 we get:}$$

$$R_2^j = (M_j - p^{F_j-1}) \frac{p}{F_j} + \frac{p^{F_j-1} + p^{F_j-1}(F_j - 1)(1-p)}{F_j} = p + p^{F_j-1}(1-p)$$

### A.3 Proof of Theorem 1

Recall that, the risk is the following:

$$R_2 = \begin{cases} M' \frac{p}{F'} & , \text{if } F' > M' + 1 \\ M' \frac{p}{F'} + \frac{p^{F'-2}}{F'} & , \text{if } F' = M' + 1 \\ p + p^{F'-1}(1-p) & , \text{if } F' = M' \\ 1 & , \text{if } F' = 1 \end{cases}$$

Where  $F' = \min_j F_j$  and  $M' = \min(M, \min_j(F_j))$ .

Given the values for  $M$  and  $p$ , we need to find the smallest value for  $F_j$  that satisfies  $R_2 \leq \tau$ .

Observe that, if  $F_j \geq M + 2$  for all  $j$ , then it is enough to have  $M \frac{p}{F_j} < \tau$  for all  $j$ .

Hence we can set our  $k$  to be

$$k = \max \left( M + 2, \left\lceil \frac{Mp}{\tau} + 1 \right\rceil \right)$$
